# Supplementary material for: Risk tolerance and control perception in a game-theoretic bioeconomic model for small-scale fisheries
Source: R Soc Open Sci. 2020 Jul 22;7(7):200621. doi: 10.1098/rsos.200621 (PMC7428242; doi:10.1098/rsos.200621)
Supplement: Azevedo_ESM [file rsos200621supp1.pdf]

## ELECTRONIC SUPPLEMENTARY MATERIAL FOR THE ARTICLE:

### Risk tolerance and control perception in a game-theoretic bioeconomic model for small-scale fisheries.

Supplementary Material S1 – The Payoffs equations.

Supplementary Material S2 – Manipulating the model.

Supplementary Material S3 – Algorithms (software: R)

Supplementary Material S4 – The System.

Supplementary Material S5 – Systems parameter's.

#### Supplementary Material S1 – The Payoffs equations.

##### *Case 1 – Cooperator meets cooperator*

In this case, both individuals are cooperators. For that reason, we can assume that fishing effort for each player is  $f^*$ , the maximum effort regulated by law. So, we can calculate how much each of these players will won. If  $c$  is the cost of a fishing effort unit for the whole season, the total cost for each fisher will be  $Cost = c \cdot f^*$ . The revenue for the cooperator is  $Revenue = H \cdot P$ . Here,  $H$  is the harvest and  $P$  is the market price of the prey.

Harvest equation tell us that

$$H = B(1 - e^{-q \cdot f})$$

But  $f = f^*$ , so:

$$H = B(1 - e^{-f^* \cdot q})$$

And then:

$$\pi_{CC} = Revenue - Cost = B(1 - e^{-q \cdot f^*}) \cdot P - c \cdot f^*$$

Finally,

$$\pi'_{CC} = \delta \cdot (B(1 - e^{-q \cdot f^*}) \cdot P - c \cdot f^*)$$

##### *Case 2 – Cooperator meets cheater*

Suppose that cooperator meet a cheater. While cooperator is fishing with the fishing effort regulated by law, cheater is using all the effort she/he can to maximize her/his profit, despite of the regulation.

Payoff for the cheater is

$$\pi_{NC} = B(1 - e^{-q \cdot f}) \cdot P - c \cdot f$$

For maximize this equation, lets derivate this function by  $f$  and make it zero.

$$\frac{\partial \pi_{NC}}{\partial f} = B(0 - (-q \cdot e^{-q \cdot f_{max}}) \cdot P - c = B \cdot P \cdot q \cdot e^{-q \cdot f_{max}} - c = 0$$

So,

$$e^{-q \cdot f_{max}} = \frac{c}{B \cdot P \cdot q}$$

And then,

$$f_{max} = -\frac{\ln\left(\frac{c}{B \cdot P \cdot q}\right)}{q}$$

With the maximum fishing effort, we can calculate the maximum harvest by

$$H_{max} = B(1 - e^{-q \cdot f_{max}})$$

From that harvest, some part will be for the cooperator and some other part (the bigger part) for the cheater. Harvested biomass will be proportional to each player fishing effort. Then

$$H_C = \frac{f_A}{f_{max}} H_{max}$$

$$H_N = \frac{f_B}{f_{max}} H_{max}$$

But  $f_C = f^*$  and  $f_C + f_N = f_{max}$ . So,  $f_N = f_{max} - f^*$ . And then, for  $H_C$  we have:

$$H_C = \frac{f^*}{f_{max}} H_{max}$$

$$H_C = \frac{f^*}{f_{max}} B(1 - e^{-q \cdot f_{max}})$$

$$H_C = \frac{f^*}{-\frac{\ln\left(\frac{c}{B \cdot P \cdot q}\right)}{q}} B \left( 1 - e^{-q \cdot \left(-\frac{\ln\left(\frac{c}{B \cdot P \cdot q}\right)}{q}\right)} \right)$$

$$H_C = -\frac{q \cdot f^*}{\ln\left(\frac{c}{B \cdot P \cdot q}\right)} \cdot B \left( 1 - e^{\ln\left(\frac{c}{B \cdot P \cdot q}\right)} \right)$$

$$H_C = -\frac{q \cdot f^*}{\ln\left(\frac{c}{B \cdot P \cdot q}\right)} \cdot B \left( 1 - \frac{c}{B \cdot P \cdot q} \right)$$

$$H_C = -\frac{q \cdot f^*}{\ln\left(\frac{c}{B \cdot P \cdot q}\right)} \cdot B \left( \frac{B \cdot P \cdot q - c}{B \cdot P \cdot q} \right)$$

$$H_C = -\frac{f^*}{\ln\left(\frac{c}{B \cdot P \cdot q}\right)} \cdot \left(\frac{B \cdot P \cdot q - c}{P}\right)$$

$$H_C = -\frac{\left(B \cdot q - \frac{c}{P}\right) \cdot f^*}{\ln\left(\frac{c}{B \cdot P \cdot q}\right)}$$

55

56 Similarly, for  $H_N$ , we have:

$$H_N = \frac{f_N}{f_{max}} H_{max}$$

$$H_N = \frac{f_{max} - f^*}{f_{max}} B(1 - e^{-q \cdot f_{max}})$$

$$H_N = \frac{-\frac{\ln\left(\frac{c}{B \cdot P \cdot q}\right)}{q} - f^*}{-\frac{\ln\left(\frac{c}{B \cdot P \cdot q}\right)}{q}} B \left(1 - e^{-q \cdot \frac{\ln\left(\frac{c}{B \cdot P \cdot q}\right)}{q}}\right)$$

$$H_N = \frac{-\frac{\ln\left(\frac{c}{B \cdot P \cdot q}\right) - q \cdot f^*}{q}}{-\frac{\ln\left(\frac{c}{B \cdot P \cdot q}\right)}{q}} B \left(1 - e^{\ln\left(\frac{c}{B \cdot P \cdot q}\right)}\right)$$

$$H_N = \frac{\ln\left(\frac{c}{B \cdot P \cdot q}\right) - q \cdot f^*}{\ln\left(\frac{c}{B \cdot P \cdot q}\right)} B \left(1 - \frac{c}{B \cdot P \cdot q}\right)$$

62 Now we can calculate  $\pi_{CN}$  and  $\pi_{NC}$ . First  $\pi_{CN}$ :

$$\pi_{CN} = H_A \cdot P - c \cdot f_A$$

$$\pi_{CN} = -\frac{\left(B \cdot q - \frac{c}{P}\right) \cdot f^*}{\ln\left(\frac{c}{B \cdot P \cdot q}\right)} \cdot P - c \cdot f^*$$

$$\pi_{CN} = -\frac{(B \cdot P \cdot q - c) \cdot f^*}{\ln\left(\frac{c}{B \cdot P \cdot q}\right)} - c \cdot f^*$$

$$\pi_{CN} = \frac{(c - B \cdot P \cdot q) \cdot f^*}{\ln\left(\frac{c}{B \cdot P \cdot q}\right)} - c \cdot f^*$$

67 And, further,  $\pi_{NC}$ :

$$\pi_{NC} = H_B \cdot P - c \cdot f_B$$

$$\pi_{NC} = \frac{\ln\left(\frac{c}{B \cdot P \cdot q}\right) - q \cdot f^*}{\ln\left(\frac{c}{B \cdot P \cdot q}\right)} B \left(1 - \frac{c}{B \cdot P \cdot q}\right) \cdot P - c \cdot (f_{max} - f^*)$$

$$\pi_{NC} = \frac{\ln\left(\frac{c}{B \cdot P \cdot q}\right) - q \cdot f^*}{\ln\left(\frac{c}{B \cdot P \cdot q}\right)} B \left(1 - \frac{c}{B \cdot P \cdot q}\right) \cdot P - c \cdot \left(-\frac{\ln\left(\frac{c}{B \cdot P \cdot q}\right)}{q} - f^*\right)$$

Adding the tendency to cooperate  $\delta$  we have:

$$\pi'_{CN} = \delta \cdot \left( \frac{(c - B \cdot P \cdot q) \cdot f^*}{\ln\left(\frac{c}{B \cdot P \cdot q}\right)} - c \cdot f^* \right)$$

and

$$\pi'_{NC} = (1 - \delta) \cdot \left( \frac{\ln\left(\frac{c}{B \cdot P \cdot q}\right) - q \cdot f^*}{\ln\left(\frac{c}{B \cdot P \cdot q}\right)} B \left(1 - \frac{c}{B \cdot P \cdot q}\right) \cdot P - c \cdot \left(-\frac{\ln\left(\frac{c}{B \cdot P \cdot q}\right)}{q} - f^*\right) \right)$$

### Case 3 – Cheater meets cheater

In this case both players are cheating upon fishing regulation. We considered, as in [1], zero payoff for both cheaters in this case. When there isn't any regulation above harvest, fishermen act as in an open access fishery and fishes until revenue matches fishery costs. So:

$$\pi'_{ANN} = (1 - \delta) \cdot 0 = 0$$

## Supplementary Material S2 – Manipulating the model.

We manipulate the model in order to get some independency from stock size. To do so we divided all payoffs by constant  $K$ , the carrying capacity, introducing, then, two new parameters:  $B' = \frac{B}{K}$  and  $c' = \frac{c}{K}$ .

$$\frac{\pi'_{CC}}{K} = \frac{\delta \cdot (B(1 - e^{-18 \cdot q}) \cdot P - c \cdot f^*)}{K}$$

$$\frac{\pi'_{CC}}{K} = \delta \cdot \left( \frac{B}{K} (1 - e^{-18 \cdot q}) \cdot P - \frac{c}{K} \cdot f^* \right)$$

$$\frac{\pi'_{CC}}{K} = \delta \cdot (B' \cdot (1 - e^{-18 \cdot q}) \cdot P - c' \cdot f^*)$$

Similarly,

For payoffs in case 2 we have:

$$\frac{\pi'_{CN}}{K} = \frac{\delta \cdot \left( \frac{18 \cdot (c - B \cdot P \cdot q)}{\ln\left(\frac{c}{B \cdot P \cdot q}\right)} - c \cdot f^* \right)}{K}$$

$$\frac{\pi'_{CN}}{K} = \delta \cdot \left( \frac{f^* \cdot \frac{(c - B \cdot P \cdot q)}{K}}{\ln\left(\frac{c}{B \cdot P \cdot q}\right)} - \frac{c}{K} \cdot f^* \right)$$

$$\frac{\pi'_{CN}}{K} = \delta \cdot \left( \frac{\left( \frac{c}{K} - \frac{B}{K} \cdot P \cdot q \right) \cdot f^*}{\ln\left(\frac{c}{B \cdot \frac{K}{K} \cdot P \cdot q}\right)} - c' \cdot f^* \right)$$

$$\frac{\pi'_{CN}}{K} = \delta \cdot \left( \frac{(c' - B' \cdot P \cdot q) \cdot f^*}{\ln\left(\frac{c}{B' \cdot K \cdot P \cdot q}\right)} - c' \cdot f^* \right)$$

$$\frac{\pi'_{CN}}{K} = \delta \cdot \left( \frac{(c' - B' \cdot P \cdot q) \cdot f^*}{\ln\left(\frac{c'}{B' \cdot P \cdot q}\right)} - c' \cdot f^* \right)$$

100

101 For the cheater in the same case we have:

$$102 \quad \frac{\pi'_{NC}}{K} = \frac{(1 - \delta) \cdot \left( \frac{\ln\left(\frac{c}{B \cdot P \cdot q}\right) - q \cdot f^*}{\ln\left(\frac{c}{B \cdot P \cdot q}\right)} B \left(1 - \frac{c}{B \cdot P \cdot q}\right) \cdot P - c \cdot \left(-\frac{\ln\left(\frac{c}{B \cdot P \cdot q}\right)}{q} - f^*\right) \right)}{K}$$

103

$$104 \quad \frac{\pi'_{NC}}{K} = (1 - \delta) \cdot \left( \frac{\ln\left(\frac{c}{B \cdot P \cdot q}\right) - q \cdot f^*}{\ln\left(\frac{c}{B \cdot P \cdot q}\right)} \cdot \frac{B}{K} \left(1 - \frac{c}{B \cdot P \cdot q}\right) \cdot P - \frac{c}{K} \cdot \left(-\frac{\ln\left(\frac{c}{B \cdot P \cdot q}\right)}{q} - f^*\right) \right)$$

105

$$106 \quad \frac{\pi'_{NC}}{K} = (1 - \delta) \cdot \left( \frac{\ln\left(\frac{c}{B \cdot \frac{K}{K} \cdot P \cdot q}\right) - q \cdot f^*}{\ln\left(\frac{c}{B \cdot \frac{K}{K} \cdot P \cdot q}\right)} \cdot B' \cdot \left(1 - \frac{c}{B \cdot \frac{K}{K} \cdot P \cdot q}\right) \cdot P - c' \cdot \left(-\frac{\ln\left(\frac{c}{B \cdot \frac{K}{K} \cdot P \cdot q}\right)}{q} - f^*\right) \right)$$

107

$$108 \quad \frac{\pi'_{NC}}{K} = (1 - \delta) \cdot \left( \frac{\ln\left(\frac{c'}{B' \cdot P \cdot q}\right) - q \cdot f^*}{\ln\left(\frac{c'}{B' \cdot P \cdot q}\right)} \cdot B' \cdot \left(1 - \frac{c'}{B' \cdot P \cdot q}\right) \cdot P + c' \cdot \left(\frac{\ln\left(\frac{c'}{B' \cdot P \cdot q}\right)}{q} + f^*\right) \right)$$

109

110 For case 3, not so much work to do:

$$111 \quad \frac{\pi'_{NN}}{K} = \frac{0}{K} = 0$$

112 Note that  $B' = \frac{B}{K}$  measures the relative stock size. Then, even if we don't know the real stock size, we  
 113 can work with overfishing, underfishing and other kinds of scenarios.

114

```

115 Supplementary Material S3 – Algorithms (software: R)
116
117 Algorithm 1
118 #####
119 #####
120 ##                      ##
121 ## Strategic game for restricted fishing effort small-scale fisheries  ##
122 ##                      ##
123 ## Author: Eric Zettermann Dias de Azevedo                      ##
124 ## Date of creation: 16/09/2019                      ##
125 ## Last update: 22/01/2020                      ##
126 ##                      ##
127 #####
128 #####
129
130 ##### DESCRIPTION#####
131 #                      #
132 # This algorithm models restricted fishing effort small-scale fisheries #
133 # using game theory. Two fishers decide to cooperate or not to      #
134 # cooperate with the fishing effort restriction regulation. To cooperate #
135 # is to follow the restriction and not to cooperate is to fish until  #
136 # maximize profit.                      #
137 #                      #
138 # This simulations aims to evaluate cooperative behaviour in different #
139 # scenarios of control perception and risk tolerance                      #
140 #                      #
141 #####
142
143
144 ls() # List objects
145 rm(list=ls()) # Remove objects

```

```

146  if(!require(plot3D)){install.packages("plot3D");library(plot3D)}
147  if(!require(RColorBrewer)){install.packages("RColorBrewer");library(RColorBrewer)}
148
149  #####
150  # Initial Set up #
151  #####
152
153  risk <- 0.3 # risk coefficient
154  # Represents risk profile of the fisher.
155  # Values variate from 0 (high-risk toleration fisher) to 1 (low-risk toleration fisher)
156
157  alpha <- 1 # Control perception
158  # Represents how much the fisher feel that the fishery is being controled by authorities
159  # Values variate from 0 (fisher did not feel any regulation enforcement) to 1 (fisher
160  # feel completely controled).
161
162
163  P <- 23 # Market price of the resourse (currency unit)
164
165  f <-18 # value of fishing units aloud by restriciotn of the fishing effort
166
167  q <- 0.023 # Catchability
168  # Prepresent how efficient is the fishing gear used to harvest.
169  # (biomass in kg per fishing unit per season)
170
171  cline <- 2*10^(-5) # cost divided per carrying capacity
172
173  #####
174
175
176  #####

```

```

177 # Variable Parameters #
178 #####
179
180 r <- seq(0.01,2,0.01) # growth rate.
181
182 Bline <- seq(0.01,1,0.01) # relative stock size
183 # represents how is the stock size relative to its carrying capacity.
184 # B'>> 1 means a stock in its maximum potencial
185 # B'>> 0 menas a stock too small compared to this potencial to be.
186
187 delta <- alpha/(1+risk/r) # tendency to cooperate
188 # represents how much the fisher is tending to cooperate
189 # accouting its control perception, risk tolerance and
190 # the stock growth rate
191 #####
192
193
194 #####
195 # Bulding outcomes #
196 #####
197
198 Resultado <- matrix(nrow=100,ncol=200,data=rep(0,2000))
199 for (i in 1:200){
200   for (j in 1:100) {
201
202     Game<- matrix(
203       nrow =2,
204       ncol=2,
205       data=c(delta[i]*(Bline[j]*(1-exp(-f*q))*P-f*cline), # cooperate and cooperate payoff
206             (1-delta[i]*((log(cline/(Bline[j]*P*q))-f*q)/log(cline/(Bline[j]*P*q))*Bline[j]*(1-
207 cline/(Bline[j]*P*q))*P+cline*(log(cline/(Bline[j]*P*q))/q+f))), # non-cooperator's payoff when the other
208 cooperates

```

```

209         delta[i]*(f*(cline-Bline[j]*P*q)/(log(cline/(Bline[j]*P*q)))-f*cline), #cooperator's payoff when the
210 other not cooperates
211         0)
212     )
213
214     # Checking for possibles outcomes - Strategies' dominance
215     # Using Nowak (2006) criteria.
216
217
218     output<- ifelse(Bline[j]*P*q<cline,0,                                # no fishing here. Costs are higher than
219 revenue.
220         ifelse(Game[1]>Game[2] & Game[3]>Game[4],1,                    # domination of cooperation
221             ifelse(Game[1]<Game[2] & Game[3]<Game[4],2,                # domination of non-
222 cooperation
223             ifelse(Game[1]>Game[2] & Game[3]<Game[4],3,                # biestability
224                 ifelse(Game[1]<Game[2] & Game[3]>Game[4],4,5)))) # Coexistence
225
226     #For the coexistence outcome, we determinate cooperative strategy frequency in the equilibrium point
227 (Nowak(2006)).
228
229     output<- ifelse(output==4 & (Game[4]-Game[3])/(Game[1]-Game[3]-Game[2]+Game[4])<0.5,3.5,
230         ifelse(output==4 & (Game[4]-Game[3])/(Game[1]-Game[3]-Game[2]+Game[4])>0.5,4,output))
231
232     Resultado[j,i]<-output # creating output matrix.
233 }
234 }
235 #####
236
237 #####
238 # Ploting graph #
239 #####
240

```

```

241 Resultado[1]<-0 # just to set color scale
242 Resultado[2]<-4 # from 0 to 4
243
244 layout(matrix(c(1,1,2), 3, 1, byrow = TRUE)) # adjust plot window
245 image2D(t(Resultado), x = seq(0.01,2,0.01), y = seq(0.01,1,0.01),xlab="r",ylab="B", lighting = F, main =
246 "Game's outputs") #ploting graph
247 mtext(paste("risco=",risk, " alpha1=",alpha," P=",P," q=",q , " c'=",cline, " f*=",f),side=3) # showing
248 parameters
249 plot(0, 0, type = "n", bty = "n", xaxt = "n", yaxt = "n",xlab="",ylab="") # adjust for subtitles
250 legend("topleft", legend=c("no fishing", "domination of cooperation","cooperative
251 coexistence"),fill=c("darkblue", "#0071FF","darkred"),cex=1, bty="n") # subtitles
252 legend("top", legend=c("domination of non-cooperation", "biestability", "non-cooperative coexistence" ),
253 fill=c("palegreen","orange","red"),cex=1, bty="n") # subtitles
254
255 #####
256
257
258 #####
259 # Evolution of cooperative strategy frequency #
260 #####
261
262 risk<-0.7
263 alpha<-1
264 layout(matrix(1, 1, 1, byrow = TRUE))
265 r <- seq(0.01,2,0.01)
266 Blinha<- seq(0.1,1,0.1)
267 freq <- c(rep(0,200))
268 plot(freq~r,type="l",lwd=3,col="white",ylim=c(0,1),ylab="Frequency of the cooperative strategy")
269 cores <- c(brewer.pal(n=9,name='PuRd'),"black") # set color scale
270
271 # plotting
272 for (j in 1:10 ){

```

```

273
274 for (i in 1:200){
275   delta <- alpha/(1+risk*r[i]) #tendency to cooperate
276
277   PM <-matrix(          # payoff's matrix
278     nrow =2,
279     ncol=2,
280     data=c( delta*(Bline[j]*(1-exp(-f*q))*P-f*cline),
281       (1-delta)*((log(cline/(Bline[j]*P*q))-f*q)/log(cline/(Bline[j]*P*q))*Bline[j]*(1-
282 cline/(Bline[j]*P*q))*P+cline*(log(cline/(Bline[j]*P*q))/(q+f)),
283       delta*(f*(cline-Bline[j]*P*q)/(log(cline/(Bline[j]*P*q)))-f*cline),
284       0)
285   )
286
287
288   fC <- (PM[4]-PM[3])/(PM[1]-PM[3]-PM[2]+PM[4]) # frequency of cooperative strategy in equilibrium
289   Nowak(2006)
290
291   fC<-ifelse(fC>1|fC<0,1,fC) # for the case of a domination
292   freq[i]<-fC
293
294 }
295 par(new=T)
296 plot(freq~r,type="l",lwd=3,ylim=c(0,1),col=cores[j],ylab="")
297 }
298 mtext(paste("risk=",risk, "control=",alpha, " P=",P, " q=",q , " c'=",cline, " f*=",f),side=3) # showing
299 parameters
300 legend("topright",legend=c("B'=0.1","B'=0.2","B'=0.3","B'=0.4","B'=0.5","B'=0.6","B'=0.7","B'=0.8","B'=0.9
301 ","B'=1.0"),col=cores,lwd=1) # subtitles for B' values.
302
303 Algorithm 2
304 #####

```

```

305 #####
306 ##                      ##
307 ## Strategic game for restricted fishing effort small-scale fisheries  ##
308 ##                      ##
309 ## Author: Eric Zettermann Dias de Azevedo                      ##
310 ## Date of creation: 16/09/2019                      ##
311 ## Last update: 22/01/2020                      ##
312 ##                      ##
313 #####
314 #####
315
316 ##### DESCRIPTION #####
317 #                      #
318 # This algorithm builds payoff's matrix, generations matrix and a graph #
319 # for frequency of the cooperative strategy in a evolutive game using #
320 # Replicator's equation (Nowak, 2006)                      #
321 # scenarios of control perception and risk tolerance          #
322 #                      #
323 #####
324
325
326 ls() # List objects
327 rm(list=ls()) # Remove objects
328 if(!require(plot3D)){install.packages("plot3D");library(plot3D)}
329
330 #####
331 # Parameters #
332 #####
333
334 risk <- 0.3
335 alpha <- 1

```

```

336 P <- 23
337 q <- 3*10^(-6)
338 cline <- 1.92*10^(-5)
339 Bline <- 0.3
340 r <- 1
341
342 fC <- 0.1 # initial population frequency
343 fN <- 0.9 #FC + FN = 1
344
345
346 #####
347 # Payoff's Matrix #
348 #####
349
350 delta <- alpha/(1+risk*r) #tendency to cooperate
351
352 MP <-matrix(      #payoff's matrix
353     nrow =2,
354     ncol=2,
355     data=c( delta*(Bline*(1-exp(-18*q))*P-18*cline),
356             (1-delta)*((log(cline/(Bline*P*q))-18*q)/log(cline/(Bline*P*q)))*Bline*(1-
357 cline/(Bline*P*q))*P+cline*(log(cline/(Bline*P*q))/q+18)),
358             delta*(18*(cline-Bline*P*q)/(log(cline/(Bline*P*q))-18*cline),
359             0)
360     )
361
362 colnames(MP)<-c("Cooperate","Not cooperate") #names for the columns
363 rownames(MP)<-c("Cooperate","Not Cooperate") #names for the rows
364 print("MATRIZ DE PAYOFFS (MP)") #print payoff's matrix
365 print(MP)      #on screen
366

```

```

367 MP<-MP/max(MP) # adjust matrix values in relation to the bigger value.
368
369 #####
370 # Generation's matrix (G) #
371 #####
372
373 G <- matrix(nrow=101,ncol=2,data=rep(0,202)) # zero's matrix to start
374 G[1,] <- c(fC,fN) # first row is the initial condition of the frequencies
375
376 for (i in 1:100){ #loop for calculate each generation frequencies using replicator's equation (Nowak
377 (2006))
378
379   fit_C = G[i,1]*MP[1,1]+G[i,2]*MP[1,2] # cooperative fitness
380   fit_N = G[i,1]*MP[2,1]+G[i,2]*MP[2,2] # non- cooperative fitness
381   fit_M = G[i,1]*fit_C+G[i,2]*fit_N # mean fitness
382
383   var_C = G[i,1]*(fit_C - fit_M) #cooperative frequency variation for the next generation
384   var_N = G[i,2]*(fit_N - fit_M) #non- cooperative frequency variation for the next generation
385
386   G[i+1,1]<-G[i,1]+var_C # cooperative frequency for next generation
387   G[i+1,2]<-G[i,2]+var_N # non-cooperative frequency for next generation
388
389   k=i+1 #counter
390
391   ifelse(G[i+1,1]>1 | G[i+1,1]<0 ,break,0) # domination alert
392   ifelse(G[i+1,2]>1 | G[i+1,2]<0 , break,0) #
393
394 }
395
396 G <- G[seq(1,k,1),] # adjusting matrix
397 print("Generation Matrix (G)") # printing

```

```

398 print(G)
399
400
401 #####
402 # Ploting graph #
403 #####
404
405 par(mfrow=c(1,1)) #ajust window
406 x <- seq(1,k,1) # generations vector
407 plot(G[,1]~x,type="l",ylim=c(0,1),col="blue",main="Dinamic of the
408 strategies",ylab="Frequency",xlab="generations",lwd=2) # frequency of coporative strategy for each
409 generation
410 lines(G[,2]~x,col="red",lwd=2) # frequency of non-cooperative strategy for each generation
411
412 legend("right", legend=c("coporative", "non-cooperative"), lty=c(1,1), col=c("blue","red"), lwd=2, bty="n")
413 # subtitles
414
415 ifelse(k<100 & G[k,1]>G[k,2],mtext(paste("Cooperative strategy dominates in ",k," generations"),side=3),
416 # decide between dominance and coexistence and show informations
417 ifelse(k<100 & G[k,1]<G[k,2],mtext(paste("Non-cooperative strategy dominates in ",k,"
418 generations"),side=3),
419 mtext(paste("Coexistence with: fC= ",round(G[100,1],digits=2)," e fN= ",
420 round(G[100,2],digits=2)),side=3)))
421
422
423 mtext(paste("risk=",risk, " alpha=",alpha, " P=",P," q=",q," c'=",cline, " B'=",Bline," r=",r," fC=",fC, "
424 fN=",fN),side=4) #show parameters
425
426

```

Supplementary Material S4 – The System.

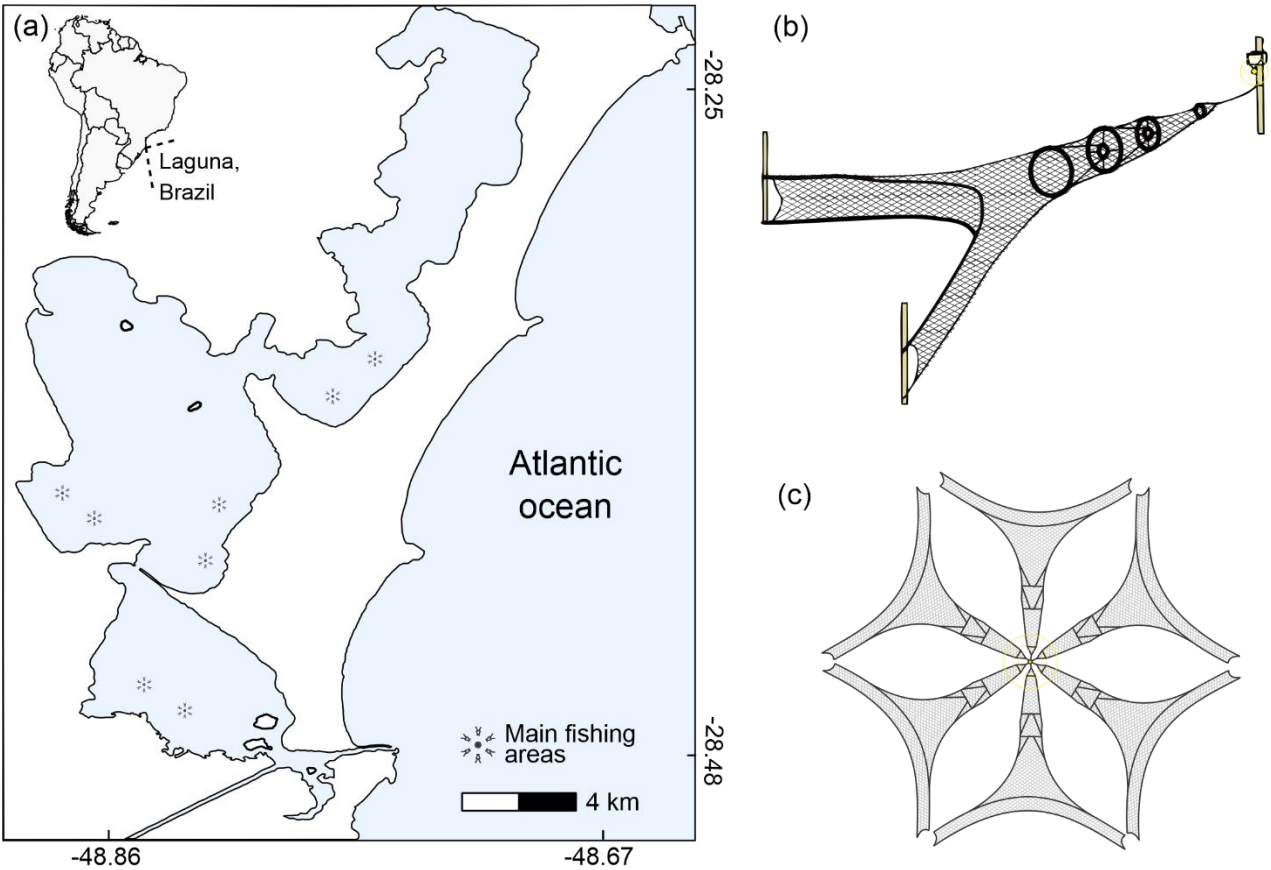

Figure 1. Fishing system characterization. (a) locates the system in the globe showing the main fishing areas while (c) and (d) illustrates the unusual fishing gear used to capture shrimps.

## Supplementary Material S5 – Systems parameter's.

Table 1. Values of case study parameters to test the model.

| Inputs   | Description                         | Values                                                                                                          |              |
|----------|-------------------------------------|-----------------------------------------------------------------------------------------------------------------|--------------|
| $B'$     | Relative stock size                 | $0 \leq B' \leq 1$                                                                                              | [1]          |
| $r$      | Growth rate                         | $0 \leq r \leq 2$                                                                                               | [2]          |
| $q$      | Catchability                        | 0.023                                                                                                           | Empirical    |
| $P$      | Fish Market price                   | 23.00                                                                                                           | Market price |
| $c'$     | Fishing unit cost/carrying capacity | $2 \times 10^{-5}$                                                                                              | Empirical    |
| $\alpha$ | Fisher's sense of control           | $\alpha = 1$ (high fisher's perception of regulation)<br>$\alpha = 0.8$ (low fisher's perception of regulation) | Empirical    |
| $b$      | Fisher's risk coefficient           | $b = 0.3$ (high fisher's tolerance of risk)<br>$b = 0.7$ (low fisher's tolerance of risk)                       | [1]          |

Empirical information and personal investigations, as well as data from technical reports from the case study were used to set the parameters for the model.

The value of  $B'$  had to be from zero to on, since it represents relative stock size (stock biomass divided by carrying capacity).

The value of  $r$  was taken from zero to two as a range the represents reasonable values for the species [2].

We set the catchability coefficient by  $q = 0.023$ . We empirically estimated CPUE using technical report data from one fishing season [3]. Then we extrapolated to estimate total stock size using the area of the gear and the area of the lagoons.

The shrimp market price was set in R\$ 23,00. This value was researched on-line on May 05<sup>th</sup> of 2019. We made an arithmetic mean for all values founded.

446 The  $c' = \frac{c}{K}$  coefficient was set by  $c' = 2 \times 10^{-5}$ . The fishing costs for one season,  $c$  was  
 447 estimated using gas prices, vessels prices, gears prices and information of the logistics of the  
 448 fishery (e.g. days of fishing and trips per day). We use the extrapolated value of the stock as  
 449 carrying capacity value,  $K$ .

450 Fishermen's high sense of control was set by  $\alpha = 1$ . The same parameter was set by  $\alpha = 0.8$  for  
 451 low control perception. Outcomes for the game when the value of this parameter was below 0.8  
 452 didn't have any cooperation dominance or cooperative coexistence.

453 Fishermen's risk tolerance was set by  $b = 0.3$  and  $b = 0.7$  for high and low tolerance,  
 454 respectively. This values are the same used in Trisak's model [1].

455

456 References

457

458 1. Trisak J. 2005 Applying game theory to analyze the influence of biological characteristics  
 459 on fishers' cooperation in fisheries co-management. *Fish. Res.* **75**, 164–174.  
 460 (doi:10.1016/j.fishres.2005.03.015)

461 2. Silva EF, Calazans N, Nolé L, Viana A, Soares R, Peixoto S, Frédou FL. 2015 Population  
 462 dynamics of the pink shrimp *farfantepenaeus subtilis* (PÉREZ-FARFANTE ,1967 ) in  
 463 northeastern Brazil. *J. Crustac. Biol.* **35**, 132–139. (doi:10.1163/1937240X-00002325)

464 3. Projeto de Monitoramento da Atividade Pesqueira no Estado de Santa Catarina - UNIVALI.  
 465 2018 Informativo estadual Nº 04 (Janeiro a Junho/2018). **02**.

466
