# Supplementary material for: Risk tolerance and control perception in a game-theoretic bioeconomic model for small-scale fisheries
Source: PubMed Central journal article supplement (PMC7428242; doi:10.1098/rsos.200621), 2020-07-22
Supplement: rsos200621_review_history.pdf [file rsos200621_review_history.pdf]

## **Risk tolerance and control perception in a game-theoretic bioeconomic model for small-scale fisheries**

Eric Zettermann Dias de Azevedo, David Valença Dantas and Fábio G. Daura-Jorge

### **Article citation details**

*R. Soc. open sci.* **7**: 200621.

<http://dx.doi.org/10.1098/rsos.200621>

### **Review timeline**

Original submission: 15 April 2020

Final acceptance: 24 June 2020

Note: Reports are unedited and appear as submitted by the referee. The review history appears in chronological order.

Note: This manuscript was transferred from another Royal Society journal with peer review.

## Review History

### RSOS-200621.R0 (Original submission)

#### Review form: Reviewer 1

**Is the manuscript scientifically sound in its present form?**

Yes

**Are the interpretations and conclusions justified by the results?**

Yes

**Is the language acceptable?**

Yes

**Do you have any ethical concerns with this paper?**

No

**Have you any concerns about statistical analyses in this paper?**

No

**Recommendation?**

Accept as is

## Comments to the Author(s)

Nice revision.

## Decision letter (RSOS-200621.R0)

We hope you are keeping well at this difficult and unusual time. We continue to value your support of the journal in these challenging circumstances. If Royal Society Open Science can assist you at all, please don't hesitate to let us know at the email address below.

Dear Mr Zettermann Dias de Azevedo:

It is a pleasure to accept your manuscript entitled "Risk tolerance and control perception in a game-theoretic bioeconomic model for small-scale fisheries" in its current form for publication in Royal Society Open Science. The comments of the reviewer(s) who reviewed your manuscript are included at the foot of this letter.

Please ensure that you send to the editorial office an editable version of your accepted manuscript, and individual files for each figure and table included in your manuscript. You can send these in a zip folder if more convenient. Failure to provide these files may delay the processing of your proof. You may disregard this request if you have already provided these files to the editorial office.

You can expect to receive a proof of your article in the near future. Please contact the editorial office ([openscience\\_proofs@royalsociety.org](mailto:openscience_proofs@royalsociety.org)) and the production office ([openscience@royalsociety.org](mailto:openscience@royalsociety.org)) to let us know if you are likely to be away from e-mail contact -- if you are going to be away, please nominate a co-author (if available) to manage the proofing process, and ensure they are copied into your email to the journal.

Due to rapid publication and an extremely tight schedule, if comments are not received, your paper may experience a delay in publication.

Please see the Royal Society Publishing guidance on how you may share your accepted author manuscript at <https://royalsociety.org/journals/ethics-policies/media-embargo/>.

Thank you for your fine contribution. On behalf of the Editors of Royal Society Open Science, we look forward to your continued contributions to the Journal.

Kind regards,  
Andrew Dunn  
Royal Society Open Science Editorial Office  
Royal Society Open Science  
[openscience@royalsociety.org](mailto:openscience@royalsociety.org)

on behalf of Dr Punidan Jeyasingh (Associate Editor)

Associate Editor Dr Punidan Jeyasingh Comments to Author:

Associate Editor: 1

Comments to the Author:

I thank the authors for a thorough revision of the ms based on comments from reviewers at ProcB. The revised version was reassessed by one (more critical) of the original reviewers. This reviewer is highly satisfied with the revisions. I agree with the expert - this version reads much better! I am happy to recommend the manuscript for publication.

Reviewer(s)' Comments to Author:

Reviewer: 1

Comments to the Author(s)

Nice revision.

Follow Royal Society Publishing on Twitter: @RSocPublishing

Follow Royal Society Publishing on Facebook:

<https://www.facebook.com/RoyalSocietyPublishing.FanPage/>

Read Royal Society Publishing's blog: <https://blogs.royalsociety.org/publishing/>
